# Supplementary material
Source: Springer Nature journal article supplement (https://www.springermedizin.de/resource/supplementary/13058_2011_2938_MOESM12_ESM.pdf/9702934)

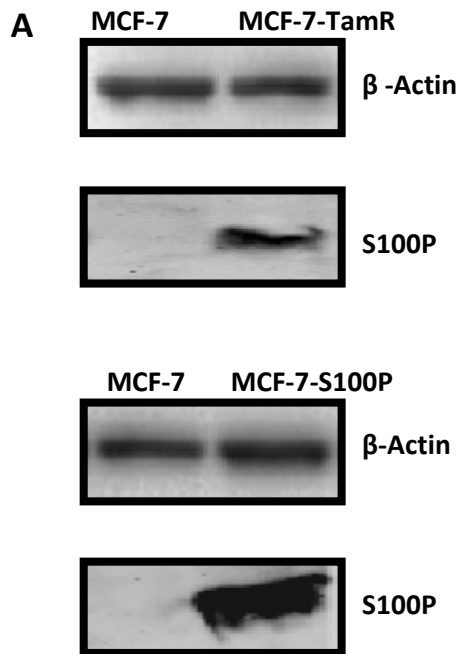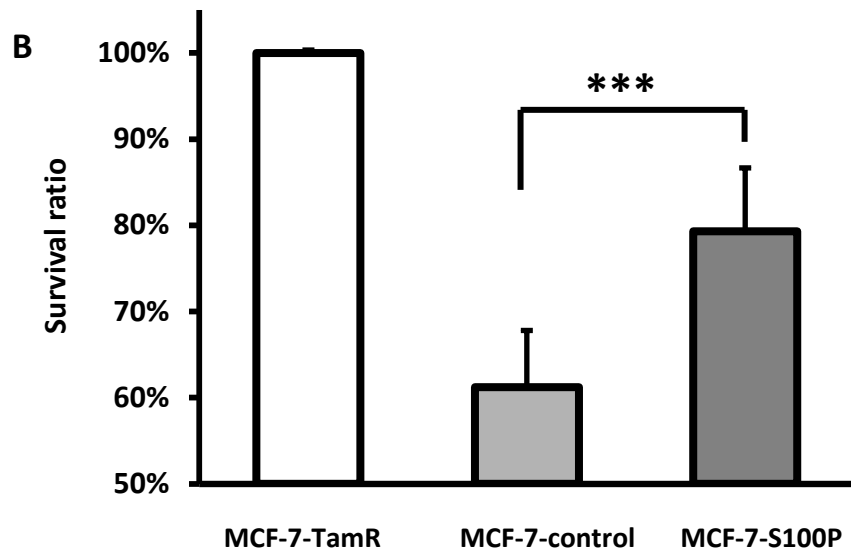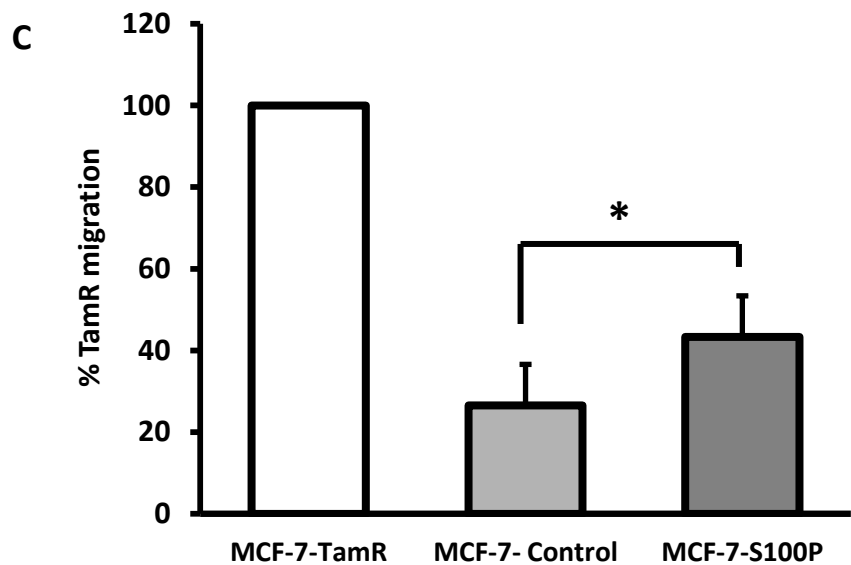

Supplement: MOESM12 [file 9702934]
